# Supplementary material
Source: PubMed Central journal article supplement (PMC2820242)
Supplement: NIHMS28099-supplement-5.pdf [file NIHMS28099-supplement-5.pdf]

|            | synonymous | complex | frameshift | in-frame | missense | splice site | nonsense | VHL mutation?              |
|------------|------------|---------|------------|----------|----------|-------------|----------|----------------------------|
| LB1047-RCC | 6          |         | 2          |          | 16       | 1           | 1        |                            |
| BB65-RCC   | 6          |         | 1          |          | 16       |             | 2        | c.575delC                  |
| PD2193a    | 4          |         |            |          | 14       | 1           |          | c.258delC                  |
| PD2198a    | 6          |         |            | 1        | 9        |             | 1        | c.525C>A                   |
| PD1768a    | 3          |         | 2          |          | 8        |             |          |                            |
| PD2134a    | 1          |         | 4          |          | 8        |             |          |                            |
| HA7-RCC    | 2          |         | 1          | 1        | 8        |             |          | c.329A>C                   |
| LB2241-RCC | 4          |         |            |          | 4        | 2           | 1        |                            |
| LB996-RCC  | 2          |         | 4          | 1        | 3        |             | 1        |                            |
| PD2163a    | 3          |         | 1          |          | 6        |             | 1        | c.501delG                  |
| PD2219a    | 4          | 2       | 1          |          | 4        |             |          |                            |
| PD2145a    |            |         |            |          | 7        | 1           | 2        |                            |
| PD2152a    | 2          |         | 1          |          | 5        | 1           | 1        | Exon 3 -1 G>T              |
| PD2170a    | 3          |         |            |          | 7        |             |          | c.282_291delGCCGAGCCC      |
| PD2205a    | 3          |         | 2          |          | 5        |             |          | c.294C>A                   |
| PD2208a    |            |         | 2          |          | 6        | 1           | 1        | c.409delG                  |
| PD2218a    | 1          |         | 3          |          | 5        |             | 1        | c.320delG                  |
| PD2173a    | 3          |         |            |          | 5        | 1           |          | c.430G>T                   |
| PD2187a    | 2          |         | 2          |          | 5        |             |          | c.406T>G                   |
| PD1766a    | 1          |         | 3          |          | 4        |             |          | c.444delT                  |
| PD2184a    | 2          |         | 1          |          | 3        | 1           |          | c.563T>G                   |
| PD2194a    | 1          |         | 1          |          | 5        |             |          | Exon 3 -3 C>G              |
| PD2199a    |            |         | 2          |          | 5        |             |          | c.587_588delAA             |
| PD2203a    |            |         | 2          | 1        | 4        |             |          | c.256C>T                   |
| PD2148a    |            |         | 1          |          | 4        |             | 1        | c.507delA                  |
| PD2175a    |            |         |            |          | 6        |             |          | c.444delT                  |
| PD2186a    | 3          |         | 1          |          | 2        |             |          | c.565_568delGAAG           |
| PD2209a    | 2          |         |            |          | 2        | 1           | 1        | c.340G>C                   |
| PD2210a    | 2          |         | 1          |          | 3        |             |          | c.404T>G                   |
| PD1582a    | 2          |         | 1          |          | 2        |             |          |                            |
| PD2141a    | 3          |         |            |          | 2        |             |          | c.563T>C                   |
| PD2167a    |            |         |            |          | 4        |             | 1        |                            |
| PD2192a    | 1          |         | 1          |          | 3        |             |          |                            |
| PD2207a    |            |         | 1          |          | 3        |             | 1        | c.452T>G                   |
| PD2214a    | 2          |         | 1          |          | 1        |             | 1        | c.526_532delAGGAGAC        |
| PD2222a    | 1          |         | 3          |          | 1        |             |          | c.506T>C                   |
| PD1580a    | 2          |         | 1          |          | 1        |             |          |                            |
| PD2127a    |            |         |            |          | 4        |             |          |                            |
| PD2132a    |            |         | 1          |          | 3        |             |          | c.485G>T                   |
| PD2140a    |            |         | 2          |          | 1        |             | 1        |                            |
| PD2147a    |            |         | 1          |          | 2        |             | 1        |                            |
| PD2153a    |            |         | 1          |          | 2        |             | 1        | c.490_491insC              |
| PD2157a    | 1          |         | 1          |          | 2        |             |          | c.394C>T                   |
| PD2166a    |            |         |            |          | 2        | 2           |          | c.499C>G                   |
| PD2171a    |            |         |            |          | 4        |             |          |                            |
| PD2188a    |            |         | 1          |          | 3        |             |          | c.227_229delTCT            |
| PD2197a    | 1          |         | 1          |          | 1        | 1           |          | c.430G>T                   |
| PD2202a    |            |         | 3          |          | 1        |             |          | c.523delT                  |
| PD1590a    | 2          |         |            |          | 1        |             |          | c.556G>T                   |
| PD2129a    | 1          |         |            |          | 2        |             |          |                            |
| PD2146a    | 1          |         |            |          | 2        |             |          |                            |
| PD2162a    |            | 1       |            |          | 2        |             |          |                            |
| PD2164a    |            |         |            |          | 2        |             | 1        | c.551T>C                   |
| PD2168a    |            |         | 1          |          | 1        |             | 1        | c.369_371delGAC            |
| PD2178a    | 1          |         |            |          | 2        |             |          |                            |
| PD2191a    | 1          |         |            |          | 1        |             | 1        | c.176delC                  |
| PD2204a    |            |         | 1          |          | 2        |             |          |                            |
| PD2213a    | 1          |         | 1          |          | 1        |             |          | c.481C>T                   |
| PD1754a    |            |         | 1          |          | 1        |             |          | Exon 2 -3 del(tagGTCACCTT) |
| PD1759a    |            |         |            |          | 2        |             |          |                            |
| PD2125a    |            |         | 1          |          | 1        |             |          |                            |
| PD2130a    |            |         |            |          | 1        |             | 1        | c.275_277delACG            |

|         |   |   |   |   |   |   |                            |
|---------|---|---|---|---|---|---|----------------------------|
| PD2131a |   |   |   | 2 |   |   |                            |
| PD2138a |   |   |   | 2 |   |   | Exon 2 +1 G>T              |
| PD2142a |   |   |   |   | 1 | 1 |                            |
| PD2150a |   |   |   | 2 |   |   | c.481C>T                   |
| PD2154a |   |   |   | 2 |   |   |                            |
| PD2182a | 1 |   | 1 |   |   |   |                            |
| PD2183a |   |   |   | 2 |   |   |                            |
| PD1769a | 1 |   |   |   |   |   | c.472C>G                   |
| PD2135a |   |   | 1 |   |   |   | c.284_285insA              |
| PD2155a |   |   |   | 1 |   |   | c.309_322delTGGCACGGGCCGCC |
| PD2156a |   |   |   | 1 |   |   | c.263G>C                   |
| PD2161a |   |   |   | 1 |   |   |                            |
| PD2172a |   |   |   |   |   | 1 |                            |
| PD2174a |   |   | 1 |   |   |   | c.302_305delTGCC           |
| PD2181a |   | 1 |   |   |   |   | c.423_430delTGTTGACG       |
| PD2190a |   |   |   | 1 |   |   | c.194C>T                   |
| PD2215a | 1 |   |   |   |   |   | c.563T>C                   |
| PD2221a |   |   |   | 1 |   |   |                            |
| PD1579a |   |   |   |   |   |   | c.225_235>T                |
| PD1593a |   |   |   |   |   |   | c.388delG                  |
| PD1753a |   |   |   |   |   |   | c.269A>T                   |
| PD2126a |   |   |   |   |   |   | c.236_241delGCAGTC         |
| PD2136a |   |   |   |   |   |   | c.515delC                  |
| PD2149a |   |   |   |   |   |   |                            |
| PD2217a |   |   |   |   |   |   |                            |
| PD2160a |   |   |   |   |   |   |                            |
| PD2133a |   |   |   |   |   |   |                            |
| PD1764a |   |   |   |   |   |   |                            |
| PD1767a |   |   |   |   |   |   |                            |
| PD2189a |   |   |   |   |   |   |                            |
| PD2180a |   |   |   |   |   |   |                            |
| PD2201a |   |   |   |   |   |   |                            |
| PD2211a |   |   |   |   |   |   |                            |
| PD2139a |   |   |   |   |   |   |                            |
| PD2177a |   |   |   |   |   |   |                            |
| PD2185a |   |   |   |   |   |   |                            |
| PD2158a |   |   |   |   |   |   |                            |
| PD2216a |   |   |   |   |   |   |                            |
| PD2176a |   |   |   |   |   |   |                            |
